# Supplementary material
Source: bioRxiv or medRxiv preprint supplement (http://biorxiv.org/highwire/filestream/24946/field_highwire_adjunct_files/0/089185-1.pdf)
Supplement: Supplementary file [file 089185-1.pdf]

## Supplementary Figure:

### Figure S1:

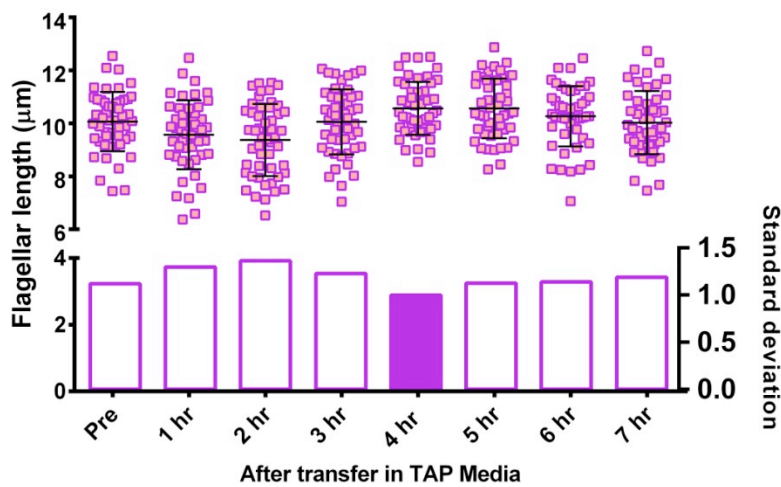

**Figure S1:** Flagellar length distribution of M-N synchronized cells at various times after transfer to TAP medium. Bars are mean and standard deviation (top half of panel). 4 hours after TAP addition is selected as the M-N synchronization time based on minimal variability (filled bar, lower half of panel). N=50.

### Figure S2:

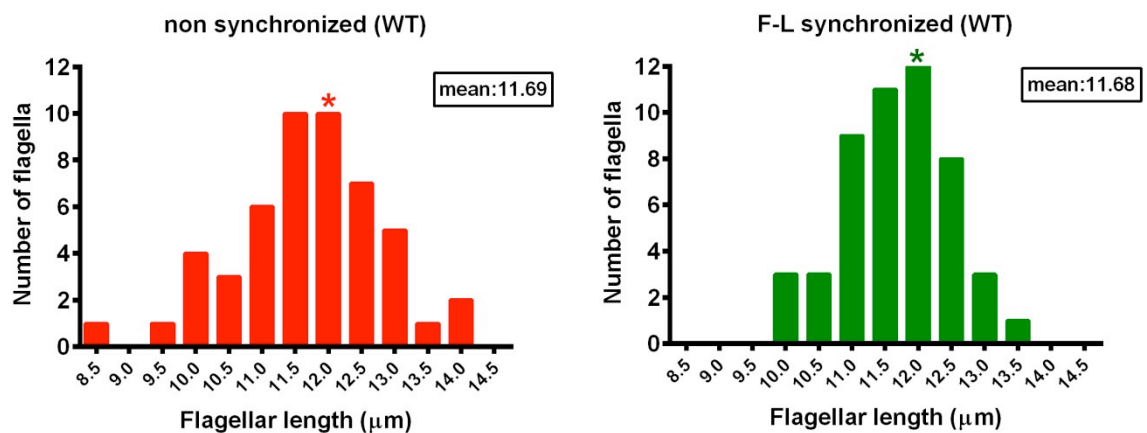

**Figure S2:** Distribution of flagellar length in wild type cells before and after F-L synchronization. Non-synchronized cells (red) and synchronized cells (green). N=50. Asterisk= mean flagellar length.

**Figure S3:**

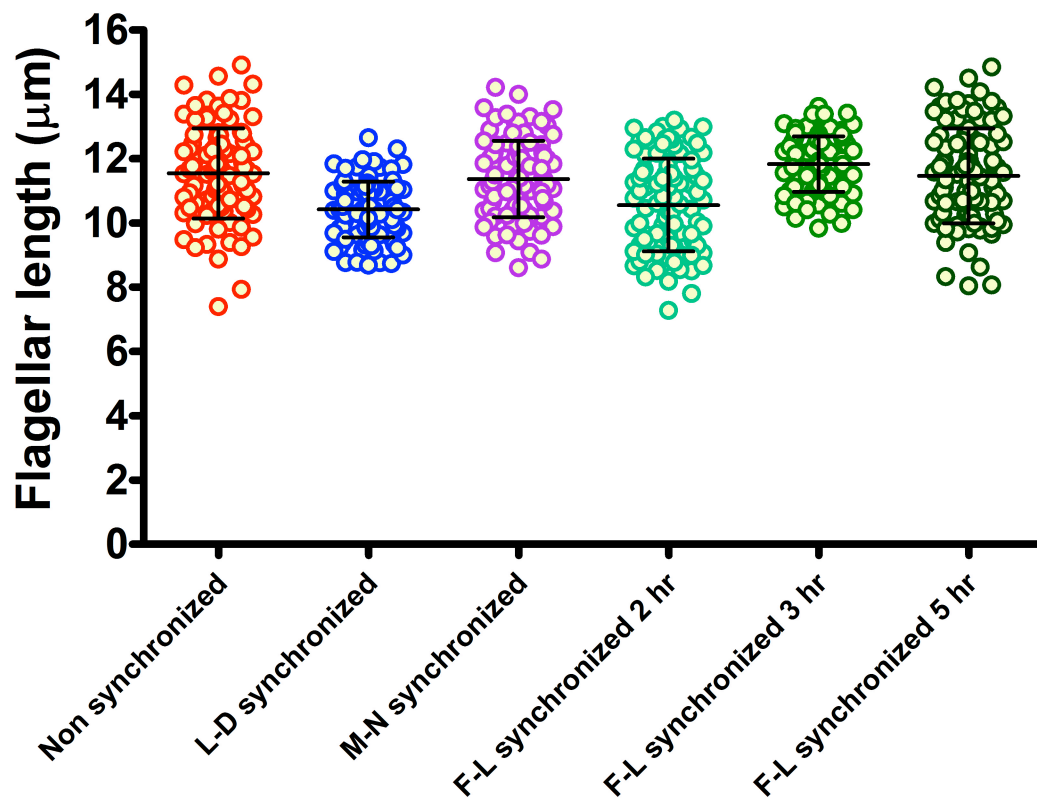

**Figure S3:** Pre-deflagellation flagellar length distribution before precursor pool determination. These data confirm Fig 1 data showing the narrowest flagellar length distribution for L-D and F-L 3 hour synchronized cells. N=100 flagella. Bars are mean and standard deviation.

## Supplementary tables:

**Table S1: Flagellar length distribution after different synchronization methods.**

|             | <b>Non-synchronized</b> | <b>L-D synchronized</b> | <b>M-N synchronized</b> | <b>F-L synchronized</b> |
|-------------|-------------------------|-------------------------|-------------------------|-------------------------|
| <b>Mean</b> | 11.43                   | 10.91                   | 11.24                   | 11.98                   |
| <b>SD</b>   | 1.269                   | 1.012                   | 1.061                   | 0.8440                  |

**Table S2: Distribution of flagellar length during regeneration following deflagellation.**

|             | <b>Pre</b> | <b>2 hour</b> | <b>2.5 hour</b> | <b>3 hour</b> | <b>3.5 hour</b> | <b>4 hour</b> | <b>5 hour</b> | <b>6 hour</b> |
|-------------|------------|---------------|-----------------|---------------|-----------------|---------------|---------------|---------------|
| <b>Mean</b> | 11.49      | 10.33         | 10.52           | 11.64         | 11.40           | 11.09         | 11.32         | 11.17         |
| <b>SD</b>   | 1.160      | 1.277         | 1.293           | 0.8732        | 1.327           | 1.342         | 1.318         | 1.373         |

**Table S3: Flagellar length distribution after length altering chemical treatment:**

| <b>Chem-ical</b> |         | <b>Non-synchronized</b> |       | <b>L-D synchronized</b> |        | <b>M-N synchronized</b> |        | <b>F-L synchronized</b> |        |
|------------------|---------|-------------------------|-------|-------------------------|--------|-------------------------|--------|-------------------------|--------|
|                  |         | Mean                    | SD    | Mean                    | SD     | Mean                    | SD     | Mean                    | SD     |
| <b>IBMX</b>      | Control | 11.03                   | 1.225 | 10.65                   | 1.029  | 11.35                   | 0.9315 | 10.70                   | 1.029  |
|                  | Treated | 7.063                   | 1.103 | 5.965                   | 1.122  | 6.657                   | 1.015  | 5.863                   | 1.015  |
| <b>LatB</b>      | Control | 12.11                   | 1.052 | 10.65                   | 1.029  | 11.31                   | 1.200  | 11.63                   | 0.8298 |
|                  | Treated | 9.122                   | 1.337 | 7.965                   | 1.164  | 9.079                   | 1.155  | 8.407                   | 0.8109 |
| <b>NaPPI</b>     | Control | 11.07                   | 1.195 | 10.42                   | 0.8714 | 10.89                   | 0.8654 | 11.94                   | 0.8855 |
|                  | Treated | 7.54                    | 1.165 | 6.198                   | 1.141  | 7.244                   | 1.324  | 6.449                   | 0.8925 |
| <b>LiCl</b>      | Control | 11.33                   | 1.118 | 10.42                   | 0.8714 | 12.10                   | 1.051  | 12.13                   | 0.8005 |
|                  | Treated | 14.49                   | 2.342 | 14.68                   | 1.479  | 15.53                   | 2.487  | 16.94                   | 1.468  |

**Table S4: Flagellar length distribution of length mutants during regeneration.**

|                 |      | Time After Regeneration |             |               |            |               |              |               |             |             |             |
|-----------------|------|-------------------------|-------------|---------------|------------|---------------|--------------|---------------|-------------|-------------|-------------|
| <i>lf4-7</i>    |      | <b>Pre</b>              | <b>2 hr</b> | <b>3 hr</b>   | <b>4hr</b> | <b>5 hr</b>   | <b>6hr</b>   | <b>7 hr</b>   | <b>8 hr</b> |             |             |
|                 | Mean | 20.8                    | 12.07       | 17.36         | 19.42      | 21.51         | <b>20.96</b> | 22.07         | 20.16       |             |             |
|                 | SD   | 3.64                    | 2.08        | 2.13          | 2.55       | 2.31          | <b>1.99</b>  | 3.19          | 3.61        |             |             |
|                 |      |                         |             |               |            |               |              |               |             |             |             |
| <i>shf1-253</i> |      | <b>Pre</b>              | <b>1 hr</b> | <b>1.5 hr</b> | <b>2hr</b> | <b>2.5 hr</b> | <b>3hr</b>   | <b>3.5 hr</b> | <b>4 hr</b> | <b>5 hr</b> | <b>6 hr</b> |
|                 | Mean | 6.4                     | 5.07        | 6.24          | 6.73       | <b>6.7</b>    | 7.13         | 6.78          | 6.54        | 6.77        | 6.56        |
|                 | SD   | 0.92                    | 0.96        | 0.92          | 0.81       | <b>0.56</b>   | 0.80         | 0.98          | 1.05        | 0.98        | 1.21        |
|                 |      |                         |             |               |            |               |              |               |             |             |             |
| <i>cnk2-1</i>   |      | <b>Pre</b>              | <b>2 hr</b> | <b>2.5 hr</b> | <b>3hr</b> | <b>3.5 hr</b> | <b>4 hr</b>  | <b>5 hr</b>   | <b>6 hr</b> |             |             |
|                 | Mean | 12.5                    | 9.61        | 10.55         | 11.12      | 11.20         | 11.64        | <b>12.2</b>   | 12.41       |             |             |
|                 | SD   | 1.05                    | 1.12        | 1.27          | 1.05       | 1.15          | 0.87         | <b>0.71</b>   | 1.01        |             |             |

**Table S5: Flagellar length distribution prior to and after cycloheximide (cyclo) treatment:**

|                   |      | <b>Non</b>          | <b>L-D</b>          | <b>M-N</b>          | <b>F-L synchronized</b> |             |             |
|-------------------|------|---------------------|---------------------|---------------------|-------------------------|-------------|-------------|
|                   |      | <b>synchronized</b> | <b>synchronized</b> | <b>synchronized</b> | <b>2 hr</b>             | <b>3 hr</b> | <b>5 hr</b> |
| <b>Pre-cyclo</b>  | Mean | 11.54               | 10.42               | 11.36               | 10.56                   | 11.83       | 11.46       |
|                   | SD   | 1.401               | 0.871               | 1.188               | 1.444                   | 0.863       | 1.474       |
|                   |      |                     |                     |                     |                         |             |             |
| <b>Post-cyclo</b> | Mean | 5.600               | 4.191               | 4.513               | 5.409                   | 6.162       | 6.156       |
|                   | SD   | 1.583               | 0.837               | 0.917               | 1.408                   | 1.097       | 1.54        |
